1

2

**TITLE:**

3

“Multimorbidity and consultation time: a systematic review”

4

5

**AUTHORS:**

6

Ana Carolina Reis Tadeu,<sup>1</sup>

7

Inês Rosendo Carvalho e Silva Caetano,<sup>1,2,5</sup>

8

Inês Jorge de Figueiredo<sup>1,3,4</sup>

9

Luiz Miguel Santiago<sup>1,5,6</sup>

10 1 – Faculty of Medicine, University of Coimbra, Portugal

11 2 – USF Coimbra Centro, Coimbra, Portugal

12 3 - USF Lusitana, ACeS Dão Lafões

13 4 - Faculty of Health Sciences, University of Beira Interior, Portugal

14 5 – General Practice/Family Practice clinic of the Faculty of Medicine of University of  
15 Coimbra, Portugal

16 6 – Center for Health and Investigation studies of the University of Coimbra (CEISUC)

17

18

**NOTE: This preprint reports new research that has not been certified by peer review and should not be used to guide clinical practice.**

19 **ABSTRACT**

20 **Background:** Multimorbidity (MM) is one of the major challenges health systems currently  
21 face. Management of time length of a medical consultation with a patient with MM is a matter  
22 of concern for doctors.

23 **Objectives:** To describe the impact of MM on the average time of a medical consultation.

24 **Methods:** A systematic review was performed considering the Preferred Reporting Items for  
25 Systematic Review and Meta-analyses (PRISMA) guidelines. The systematic online searches  
26 of the Embase and PubMed databases were undertaken, from January 2000 to August 2018.  
27 The studies were independently screened by two reviewers to decide which ones met the  
28 inclusion criteria. (Kappa=0.84 and Kappa=0.82). Differing opinions were solved by a third  
29 person. This systematic review included people with MM criteria as participants (two or more  
30 chronic conditions in the same individual). The type of outcome included was explicitly defined  
31 – the length of medical appointments with patients with MM. Any strategies aiming to analyse  
32 the impact of MM on the average consultation time were considered. The length of time of  
33 medical appointment for patients without MM was the comparator criteria. Experimental and  
34 observational studies were included.

35 **Results:** Of 85 articles identified, only 1 observational study was included, showing a clear  
36 trend for patients with MM to have longer consultations than patients without MM criteria  
37 ( $p<0.001$ ).

38 **Conclusions:** More studies are necessary to assess better allocation length-time for patients  
39 with MM and to measure other characteristics like doctors workload.

40 **Keywords:** Multimorbidity; Medical appointment; Quality of healthcare; Consultation length-  
41 time.

42

## 43 1. INTRODUCTION

44 Multimorbidity (MM) is defined by the European General Practice Research Network  
45 as "any combination of chronic disease with at least one other disease (acute or chronic) or  
46 biopsychosocial factor (associated or not) or somatic risk factor".<sup>1</sup> This is sometimes simplified  
47 to, "the simultaneous occurrence of two or more chronic diseases in the same individual".<sup>2</sup>  
48 MM is now one of the main challenges faced by health systems at an international level and  
49 occupies a considerable part of the daily activity of General Practitioners/Family Doctors  
50 (GPs/FMs) around the world.<sup>3-6</sup>

51 With an ever ageing world population, MM and its consequences, are becoming a  
52 major issue in public health and primary care. According to United Nations data,<sup>7,8</sup> Europe has  
53 the largest percentage of population aged 60 or over (25%).<sup>7</sup> In 2015 the number of people in  
54 the world aged 60 years and older was 901 million.<sup>8</sup> It is projected that in 2030 this figure will  
55 rise to 1.4 billion (a 56% increase since 2015) and stand at 2.1 billion in 2050.<sup>8</sup> Several studies  
56 have shown that there is a significant association between age<sup>2</sup> and the prevalence of MM,  
57 most national health systems not being prepared or able to cope with this rapid ageing with  
58 many demands.<sup>5,6</sup>

59 So it is imperative to think about the approach to patients with MM to maximize the  
60 quality of services provided by the Health Services (HS) consequently guaranteeing a better  
61 quality of life for such patients.

62 GPs/FMs medical team face various difficulties in caring for a patient with MM like lack  
63 of resources; consultation time restrictions; lack of interdisciplinary care/teams; inadequate  
64 patient support (largely relying on community-based support services); inadequate tools  
65 (guidelines are drawn up strictly for specific diseases and not for the MM patient); the attitude  
66 of the patient (often discouraged and poorly engaged).<sup>4,9</sup>

67           Information about the length-time of a consultation with a patient with MM is essential  
68 to better organize and deliver healthcare. To our knowledge, no previous review has  
69 summarized data related to: “What is the impact of having MM on the medical consultation?”  
70 “Is the average length-time consultation with a patient with MM longer than for a patient without  
71 MM?”

72

73

74

75

76

77

78

79

80

81

82

83

84

85

86

## 87 **2. METHODS**

88 A systematic review was performed considering the Preferred Reporting Items for  
89 Systematic Review and Meta-analyses (PRISMA) guidelines for systematic reviews and meta-  
90 analysis with:

### 91 **2.1 Eligibility criteria**

92 Articles about people with MM. The most widely used definition of MM was used, which  
93 is the coexistence of two or more chronic conditions in the same individual.<sup>2</sup> The World Health  
94 Organization (WHO) definition of chronic disease was adopted, namely, “health problems that  
95 require ongoing management over a period of years or decades”.<sup>10</sup>

96 Studied outcome: explicitly defined length-time of medical appointments with patients  
97 with MM. Any strategies aiming to analyse the impact of MM on the average consultation time  
98 were considered. Studies which did not specify the time spent on medical appointments were  
99 excluded.

100 The length of time of medical appointment for patients without MM was the comparator  
101 criteria.

102 Experimental and observational studies were included.

### 103 **2.2 Information sources and search strategy**

104 The systematic online searches were undertaken using combinations of keywords in  
105 the following electronic databases: the Embase and PubMed databases, from 1<sup>st</sup> January  
106 2000 until the 31<sup>st</sup> August 2018 to find pertinent studies.

107 The search was limited to papers in English, Portuguese, Spanish and French. No  
108 other limits were imposed during this stage of the study.

109

## 110 **2.3 Data extraction and quality assessment**

111 The potentially relevant studies were selected in two stages. First, the titles and  
112 abstracts quoted in the literature search were independently screened by two reviewers (CT  
113 and IF) to decide which ones met the inclusion criteria ( $Kappa=0.84$ ). Those not meeting the  
114 inclusion criteria were excluded. Differing opinions on studies inclusion were resolved by a  
115 third person (IR).

116 Secondly, the researchers independently read and analysed the integrity of the  
117 matching studies and tried to reach an agreement concerning eligibility ( $Kappa=0.82$ ). Those  
118 not meeting the inclusion criteria were excluded. The quality and risk of bias of the included  
119 studies was assessed using the Newcastle-Ottawa Scale (NOS), more precisely, the  
120 Newcastle-Ottawa scale adapted for cross-sectional studies.<sup>11</sup> This tool assesses three  
121 aspects of a study: the selection of the sample; the comparability of the groups; and the  
122 outcome (assessment of outcome and statistical test). It is composed of 7 items and classifies  
123 the study in 4 possible levels: Very good (9-10 points), Good (7-8 points), Satisfactory (5-6  
124 points) and Unsatisfactory (0-4 points). Any disagreement was resolved through consensus.

125 This systematic review was conducted using Covidence<sup>13</sup>, the standard production  
126 platform used for Cochrane reviews, which was used for the data and records management.

## 127 **2.4 Outcomes and statistical analysis**

128 The patients were split into two groups, those with and those without MM, and  
129 the relative frequencies were calculated. The results were analyzed using the chi-square  
130 distribution test.

131

132

133

134 **3. RESULTS**

135 **3.1 Study selection**

136 As described in **Flowchart 1**, the electronic database searches started with 85  
137 potentially eligible references (26 in PubMed and 59 in Embase). Of these, 5 were duplicates  
138 and were thus excluded and 31 were considered irrelevant based on a review of the title and  
139 abstract. The remnant studies were fully read, analysed and assessed for eligibility, 36 being  
140 excluded due to wrong outcome<sup>3,12-46</sup>, 5 because of wrong study design<sup>47-51</sup>, 4 due to wrong  
141 patient population<sup>9,52-54</sup>, 2 for wrong language<sup>55-56</sup> and 1 for wrong setting<sup>57</sup>. In the end, 1 study  
142 was included.<sup>58</sup>

143

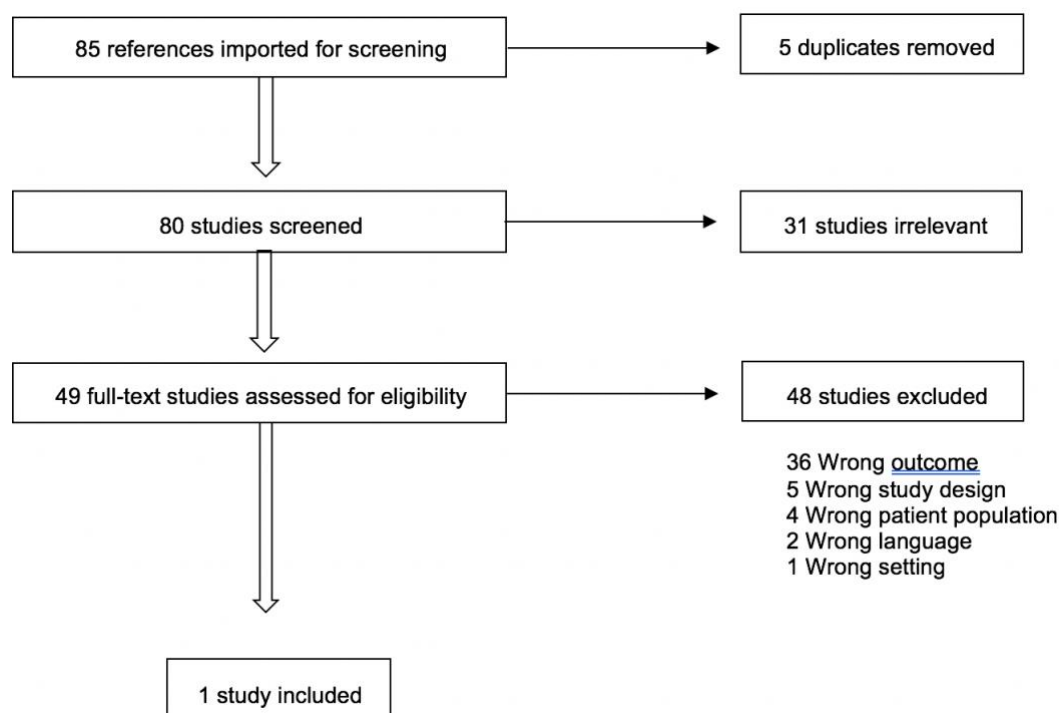

144

145

146

147

**Flowchart 1** – Literature search and selection process for studies included.

148

### 149 3.2 Study characteristics and quality

150 The main relevant features and outputs of the study were extracted for the purpose of  
151 this systematic review and are summed up in **Table 1**.

152 The included study was conducted between 2008 and 2009 in Denmark, over 12  
153 months. It involved 404 general practitioners (GPs) participants and a total of 8236 contacts.  
154 It included patients aged 40 years or more, grouped as those without any chronic condition  
155 and those with one, two, three or more chronic conditions.

156 During the study period, the GPs completed a one-page registration form for each of  
157 their patient contacts. Of the various items that were registered, the ones relevant for this  
158 review were information on chronic diseases and length-time of consultation. Quality  
159 assessment result, performed as described in methodology, is presented in **Table 2**. The  
160 quality of the study was considered satisfactory (score 6 out of a maximum score of 10), its  
161 main weakness being in the comparability section.

162

163

164

165

166

167

168

169

170

171

172

173

174

175



176  
177  
178  
179  
180

**Table 1** – Summary of study’s characteristics.

| Author     | Year of study | Country | Design          | Number of participants | Population (inclusion criteria) | Setting          | Method of data collection                                                                                           | Outcomes measured                                                                                                                                                                                                                                                                                                  | Author’s conclusions                                                                                                                                             |
|------------|---------------|---------|-----------------|------------------------|---------------------------------|------------------|---------------------------------------------------------------------------------------------------------------------|--------------------------------------------------------------------------------------------------------------------------------------------------------------------------------------------------------------------------------------------------------------------------------------------------------------------|------------------------------------------------------------------------------------------------------------------------------------------------------------------|
| Moth et al | 2008-2009     | Denmark | Cross-sectional | 404 GPs, 8236 contacts | Persons aged 40 years or more   | General practice | Registration form completed by GP about all patient contacts on one randomly assigned date during the study period. | - Length of consultation time, chronic disease, reason for appointment, diagnosis, number of additional psychosocial problems raised by the patient during the consultation, difficulty found with consultation of the consultation, referral to specialized care, and whether a nurse could have replaced the GP. | - GPs found consultations with patients suffering from chronic conditions to be more difficult than those with patients without chronic disease ( $p < 0.001$ ). |

181 GP – General Practitioner.

182  
183  
184

**Table 2** – Quality of study - Newcastle-Ottawa Scale adapted for cross-sectional studies.

| Author     | Selection                        |             |                 |                                         | Comparability                                                                             | Outcome               |                  | Total score | Power        |
|------------|----------------------------------|-------------|-----------------|-----------------------------------------|-------------------------------------------------------------------------------------------|-----------------------|------------------|-------------|--------------|
|            | Representativeness of the sample | Sample size | Non-respondents | Ascertainment of exposure (risk factor) | Comparability of subjects in different outcome groups on the basis of design or analysis. | Assessment of outcome | Statistical test |             |              |
| Moth et al | *                                | - (b)       | *               | **                                      | -                                                                                         | *                     | *                | 6*          | Satisfactory |

185 (b) – Calculation not reported.  
186

187  
188

189 **3.3 Results of study**

190 **Table 3** shows the relationship between the length of consultation time and the type  
191 of patient (with and without MM). There is a clear significant trend for patients with MM to  
192 have longer consultations than patients without MM ( $p<0.001$ ).

193 More than 25% of MM patients had a consultation length-time of at least 16 minutes  
194 while more than 75% of the patients without MM had a consultation length-time under 15  
195 minutes. Length-time consultation on both types of patients is more frequently between 6 and  
196 15 minutes. There is a significant difference, however, in the percentage of patients with MM  
197 requiring more time than patients without MM criteria.

| Length of consultation time | No MM |      | MM   |      | p-value |
|-----------------------------|-------|------|------|------|---------|
|                             | (n)   | %    | (n)  | %    |         |
| <5 min                      | 293   | 11.7 | 96   | 7.7  | p<0.001 |
| 6-15 min                    | 1686  | 67.3 | 804  | 64.9 |         |
| 16-30 min                   | 485   | 19.4 | 314  | 25.3 |         |
| >30 min                     | 42    | 1.7  | 25   | 2.0  |         |
| <b>Total</b>                | 2506  | 100  | 1239 | 100  |         |

198

199

200

201

202

203

204

#### 205 4. DISCUSSION

206 The present systematic review sought to answer the following question: “Is the average  
207 consultation time spent on patients with MM longer than that spent on patients who do not  
208 meet the MM criteria?” could only identify one study,<sup>58</sup> undertaken in Denmark, in which the  
209 consultation time was logged as a function of the number of chronic diseases. This study  
210 revealed a tendency for consultations to take longer for patients with MM than for those without  
211 MM. However, the study was not directly aimed at answering this question and it did not take  
212 confounding factors into account. In addition, it does not describe the calculation to determine  
213 the sample size of the study and it could be inaccurate to study this specific outcome. So the  
214 study was classified as “Satisfactory”.

215 The small number of publications in the literature on this subject shows that more  
216 studies should be designed to investigate the impact of MM on the consultation length-time. It  
217 is vital to analyse this issue in order to manage resources so that they meet the actual need,  
218 and to ensure the services provided by health services, national or private, are appropriate. It  
219 will thus be possible to guarantee better quality health services and outcomes for these  
220 patients. In fact MM is about a patient with more than two chronic diseases or one chronic  
221 disease with biopsychosocial factor (associated or not) or somatic risk factor, so illness being  
222 included and not only about the specific sufferances.<sup>1,9</sup>

223 In studies with calculated size population representative random samples it is  
224 important that accurate methods are used to measure the real length-time of a consultation  
225 (i.e. from the moment that the doctor opens the patient’s file to the moment it is closed). Using  
226 stop-watches and self-reporting will probably lead to inaccuracies. The calculation of the  
227 length-time of the consultation obtained by dividing the total time a medical practitioner is in  
228 the clinic by the number of patients could yield average times that mask the real duration of  
229 each patient’s consultation. Also confounding factors must be eliminated as the time spent on  
230 administrative work, breaks and work meetings. Only direct observation using video recording

231 has been proven to obtain accurate values when measuring the duration of consultations,<sup>59</sup>  
232 which could be a procedure that mitigates many of the errors previously mentioned. The  
233 length-time of a consultation must be measured accurately to avoid errors and skewed  
234 judgements. It is essential to identify beforehand any possible confounding factors inherent to  
235 the patients (for example, hearing difficulty, education level, age, socio-economic level),  
236 inherent to the doctor (in particular, a change in behaviour due to the participation in the  
237 research study – Hawthorne effect<sup>60</sup>), and inherent to the consultation/institution (for example,  
238 glitches in computer systems, organization of necessary information in the health informatics  
239 records, coding errors, telephone call interruptions). The time lost searching for information in  
240 consultation, the friendliness of clinical informatics and the time spent on e.records are also  
241 issues to be studied and thought of <sup>61, 62</sup>. Health determinants are factors to be studied in such  
242 a MM population for better health and social outcomes.<sup>63</sup>

243         The data analysis must be evaluated using objective validated laboratory methods  
244 and, if possible, it should be a blind assessment. Statistical tests used to analyse the data  
245 must be appropriate and clearly described. Measures of association, including confidence  
246 intervals and the P value, must be presented.

247         The main limitation of this systematic review was the difficulty in ensuring that all the  
248 relevant literature was included. Even though the research used two of the main databases –  
249 Pubmed and Embase – there could be other relevant material in grey literature.

250         The scarcity of the literature that was found was a limitation for this review. The one  
251 publication found, besides not directly answering our question, also does not take confounding  
252 factors into account, and does not describe the calculation to determine the sample size of the  
253 study. However, it does highlight the relevance of the subject matter.

254

255

256

257

## 258 **5. CONCLUSIONS**

259           This “impact of MM on the duration of a consultation” has hardly been studied, this  
260 systematic review shows.

261           A tendency for consultations of patients with MM to take longer than those without MM  
262 was found in the only one study with “satisfactory” quality which met the inclusion criteria.

263           So more research is needed to acquire more information on this subject, important to  
264 deal not only with diseases but with the person suffering from MM for consultation must have  
265 the adequate length duration to enable doctors and stake-holders with a proper quantification  
266 of the time and associated costs.

267           If a longer consultation time is confirmed, it will be important to rethink and adapt GPs’  
268 lists of patients in order to achieve better medical care providing agendas with specific times  
269 and allocating enough time for all the required tasks.

270

271

272

273

274

275

276

277

278

279

280

281 **6. LIST OF ABBREVIATIONS**

282 MM – Multimorbidity

283 GP – General Practitioner

284 PRISMA – Preferred Reporting Items for Systematic Review and Meta-analyses

285 HS – Health Service

286 WHO – World Health Organization

287

288 **7.DECLARATIONS:**

289 Ethics approval and consent to participate – Not applicable

290 Consent for publication – Not applicable

291

292 Availability of data and materials – Materials can be assessed upon request

293

294

295 Financial and non-financial competing interests:

296 No author states financial and non-financial competing interests for this work.

297 .

298

299 Authors' contributions

300 ACRT: Data extraction, data examination, treatment of data, writting of manuscript and its  
301 scientific cticism as well as aproval.

302 IRCSC: Data extraction, data examination, treatment of data, writting of manuscript and its  
303 scientific cticism as well as aproval.

304 Inês Jorge de Figueiredo: Sata examination, treatment of data, writting of manuscript and its  
305 scientific cticism as well as aproval.

306 Luiz Miguel Santiago: Scientific review of the article.

307 All authors read and approved the final manuscript.

308

309 Acknowledgements –

310 Helena Donato, MD for her valuable contribution in the literature search.

311

312 Group authorship: Not aplicable

313

314

315 Authors' information

316 Ana Carolina Reis Tadeu,<sup>1</sup>

317 Inês Rosendo Carvalho e Silva Caetano,<sup>1</sup>

318 Inês Jorge de Figueiredo<sup>3</sup>

319 Luiz Miguel Santiago<sup>4</sup>

320 1 – MD

321 2 – MD, PhD. GP/FD

322 3 – MD, PhD student; GP/FD

323 4 – MD, PhD, Associate Professor with Agregation; Senior consultant GP/FD

324

325

326

327

328

329

330

331

332

333

334

335

336



337

338

339

340 **7. REFERENCES**

341 1. Le Reste JY, Nabbe P, Manceau B, Lygidakis C, Doerr C, Lingner H, et al. The  
342 European General Practice Research Network presents a comprehensive definition of  
343 multimorbidity in family medicine and long term care, following a systematic review of relevant  
344 literature. *J Am Med Dir Assoc.* 2013;14(5):319-25.

345 2. Violan C, Foguet-Boreu Q, Flores-Mateo G, Salisbury C, Blom J, Freitag M, et al.  
346 Prevalence, determinants and patterns of multimorbidity in primary care: a systematic review  
347 of observational studies. *PLoS One.* 2014;9(7):e102149.

348 3. Glynn LG, Valderas JM, Healy P, Burke E, Newell J, Gillespie P, et al. The prevalence  
349 of multimorbidity in primary care and its effect on health care utilization and cost. *Fam Pract.*  
350 2011;28(5):516-23.

351 4. Moffat K, Mercer SW. Challenges of managing people with multimorbidity in today's  
352 healthcare systems. *BMC Fam Pract.* 2015;16:129.

353 5. Azais B, Bowis J, Wismar M. Facing the challenge of multimorbidity. *J Comorb.*  
354 2016;6(1):1-3.

355 6. Navickas R, Petric VK, Feigl AB, Seychell M. Multimorbidity: What do we know? What  
356 should we do? *J Comorb.* 2016;6(1):4-11.

357 7. United Nations, Department of Economic and Social Affairs, Population Division. *World*  
358 *Population Prospects: The 2017 Revision, Key Findings and Advance Tables.* 2017. p. 11.

- 359 8. United Nations, Department of Economic and Social Affairs, Population Division. *World*  
360 *Population Ageing 2015*. 2015. p. 9.
- 361 9. Prazeres F, Santiago L. The Knowledge, Awareness, and Practices of Portuguese  
362 General Practitioners Regarding Multimorbidity and its Management: Qualitative Perspectives  
363 from Open-Ended Questions. *Int J Environ Res Public Health*. 2016;13(11).
- 364 10. World Health Organization. Innovative care for chronic conditions: building blocks for  
365 action. Global report. World Health Organization, 2002.
- 366 11. Lo CK, Mertz D, Loeb M. Newcastle-Ottawa Scale: comparing reviewers' to authors'  
367 assessments. *BMC Medical Research Methodology*. 2014,14:45.
- 368
- 369 12. Gunturi N, Gunturi N, Gennari A, Bartels K. Patient-centered Goals of Care: Using the  
370 Chronic Care Management (CCM) Code Towards Cooperative Goal Setting in the Multimorbid  
371 Elderly. *Journal of the American Medical Directors Association*. 2018;19(3).
- 372 13. Johnson TL, Kaldor J, Falster MO, Sutherland K, Humphries J, Jorm LR, et al.  
373 Predictive risk modelling under different data access scenarios: who is identified as high risk  
374 and for how long? *BMJ Open*. 2018;8(2).
- 375 14. Kangovi S, Carter T, Charles D, Smith RA, Glanz K, Long JA, et al. Toward A Scalable,  
376 Patient-Centered Community Health Worker Model: Adapting the IMPaCT Intervention for Use  
377 in the Outpatient Setting. *Popul Health Manag*. 2016;19(6):380-8.
- 378 15. Mann EG, Johnson A, VanDenKerkhof EG. Frequency and characteristics of  
379 healthcare visits associated with chronic pain: results from a population-based Canadian  
380 study. *Can J Anaesth*. 2016;63(4):411-41.

- 381 16. Palmer K, Onder G. Comprehensive geriatric assessment: Benefits and limitations.  
382 Eur J Intern Med. 2018;54:e8-e9.
- 383 17. Rosbach M, Andersen JS. Patient-experienced burden of treatment in patients with  
384 multimorbidity - A systematic review of qualitative data. PLoS One. 2017;12(6):e0179916.
- 385 18. Salisbury C, Johnson L, Purdy S, Valderas JM, Montgomery AA. Epidemiology and  
386 impact of multimorbidity in primary care: a retrospective cohort study. Br J Gen Pract.  
387 2011;61(582):e12-21.
- 388 19. Sampalli T, Desy M, Dhir M, Edwards L, Dickson R, Blackmore G. Improving wait times  
389 to care for individuals with multimorbidities and complex conditions using value stream  
390 mapping. Int J Health Policy Manag. 2015;4(7):459-66.
- 391 20. Smith SM, Soubhi H, Fortin M, Hudon C, O'Dowd T. Managing patients with  
392 multimorbidity: systematic review of interventions in primary care and community settings.  
393 BMJ. 2012;345:e5205.
- 394 21. Stokes T, Tumilty E, Doolan-Noble F, Gauld R. Multimorbidity, clinical decision making  
395 and health care delivery in New Zealand Primary care: a qualitative study. BMC Fam Pract.  
396 2017;18(1):51.
- 397 22. Tetzlaff J, Junius-Walker U, Muschik D, Epping J, Eberhard S, Geyer S. Identifying  
398 time trends in multimorbidity—defining multimorbidity in times of changing diagnostic  
399 practices. Journal of Public Health. 2016;25(2):215-22.
- 400 23. Tinetti ME, Naik AD, Dodson JA. Moving From Disease-Centered to Patient Goals-  
401 Directed Care for Patients With Multiple Chronic Conditions: Patient Value-Based Care. JAMA  
402 Cardiol. 2016;1(1):9-10.

- 403 24. Wong ES, Rosland AM, Fihn SD, Nelson KM. Patient-Centered Medical Home  
404 Implementation in the Veterans Health Administration and Primary Care Use: Differences by  
405 Patient Comorbidity Burden. *J Gen Intern Med.* 2016;31(12):1467-74.
- 406 25. European General Practice Research Network (EGPRN) Abstracts from the EGPRN  
407 meeting in Leipzig, Germany, 12-16 October 2016. Theme: 'General practice/family medicine  
408 in a changing world'. *Eur J Gen Pract.* 2017;23(1):143-54.
- 409 26. Abraham-Kaba A, Stopol C. Survivorship Continuum: Implications for Patient-  
410 Centered Programming. *Journal of Psychosocial Oncology.* 2016; 34(1-2):125-27.
- 411 27. *Annals of Long-Term Care: Clinical Care and Aging.* 2016;24(4):17-20.
- 412 28. Blomgreen J, Ekman A, Nygaard H, Demény AK, Wejse MR, Pressel E. Geriatric  
413 assessment at the Acute Medical Unit: Improving the outcome. *European Geriatric*  
414 *Medicine.* 2017; 8(1): s153.
- 415 29. Scheiner SR, Olson JM, Velner J. Collaborative drug therapy management in a  
416 skilled nursing facility to improve transitions of care in older adults. *Pharmacotherapy.*  
417 2017; 37(12): e221-e222.
- 418 30. Osborn R, Moulds D, Schneider EC, Doty MM, Squires D, Sarnak DO. Primary Care  
419 Physicians In Ten Countries Report Challenges Caring For Patients With Complex Health  
420 Needs. *Health Affairs.* 2015; 34(12): 2104–2112.
- 421 31. Bower P. Better management of multimorbidity: a critical look at the 'Ariadne principles'.  
422 *BMC Medicine.* 2014; 12:222.
- 423 32. Cassil A. Innovations in preventing and managing chronic conditions: what's working  
424 in the real world?. *Issue brief.* 2010; 132: 1-4.

- 425 33. Porter I, Valderas JM. Development of a feedback form for routine clinical use of  
426 PROs in primary care for patients with multimorbidity. *Quality of Life Research*. 2015; 24(1):  
427 181-182.
- 428 34. Ehman KM, Deyo-Svendsen M, Merten Z, Kramlinger AM., Garrison G.M. How  
429 Preferences for Continuity and Access Differ Between Multimorbidity and Healthy Patients  
430 in a Team Care Setting. *Journal of primary care & community health*. 2017; 8(4): 319-323.
- 431 35. Vasquez AH, Patel N, Tripathy C, Jaen C. Optimizing virtual care to improve access and  
432 quality of care. *Journal of the American Geriatrics Society*. 2018; 66 (2): 109.
- 433 36. Fisher K, Griffith L, Gruneir A, Panjwani D, Gandhi S, Sheng LL, et al. Comorbidity and  
434 its relationship with health service use and cost in community-living older adults with diabetes:  
435 A population-based study in Ontario, Canada. *Diabetes Res Clin Pract*. 2016;122:113-23.
- 436 37. Hien H, Ouedraogo M, Berthe A, Konate B, Toe N, Drabo MK, et al. [Patient  
437 complaints: an opportunity to improve the quality of care of older people with multimorbidity in  
438 Burkina Faso]. *Pan Afr Med J*. 2017;28:140.
- 439 38. Junius-Walker U, Voigt I, Wrede J, Hummers-Pradier E, Lazic D, Dierks ML. Health  
440 and treatment priorities in patients with multimorbidity: report on a workshop from the  
441 European General Practice Network meeting 'Research on multimorbidity in general practice'.  
442 *Eur J Gen Pract*. 2010;16(1):51-4.
- 443 39. Kadam UT, Croft PR, North Staffordshire GPCG. Clinical multimorbidity and physical  
444 function in older adults: a record and health status linkage study in general practice. *Fam*  
445 *Pract*. 2007;24(5):412-9.
- 446 40. Strauss VY, Jones PW, Kadam UT, Jordan KP. Distinct trajectories of multimorbidity  
447 in primary care were identified using latent class growth analysis. *J Clin Epidemiol*.  
448 2014;67(10):1163-71.

- 449 41. van Dongen JJ, Lenzen SA, van Bokhoven MA, Daniels R, van der Weijden T,  
450 Beurskens A. Interprofessional collaboration regarding patients' care plans in primary care: a  
451 focus group study into influential factors. *BMC Fam Pract.* 2016;17:58.
- 452 42. Johnson TL, Kaldor J, Falster MO, Sutherland K, Humphries J, Jorm LR, et al.  
453 Predictive risk modelling under different data access scenarios: who is identified as high risk  
454 and for how long? *BMJ Open.* 2018;8(2).
- 455 43. Lam CLK, Calvert MJ, Valderas JM, Wee HL, Gibbons C. Routine applications of  
456 patient reported outcomes (PROs) in primary care: Identifying and overcoming the  
457 challenges. *Quality of Life Research.* 2016; 25(1): 9.
- 458 44. Potter C, Hunter C, Kelly L, Gibbons E, Forder J, Coulter A, Fitzpatrick R, Peters M.  
459 PROs for personalized care: Patient perspectives on potential use of the long-term  
460 conditions questionnaire (LTCQ) in clinical practice. *Quality of Life Research.* 2016; 25(1):  
461 196.
- 462 45. Jowsey T, McRae IS, Valderas JM, Dugdale P, Phillips R, Bunton R, et al. Time's up.  
463 descriptive epidemiology of multi-morbidity and time spent on health related activity by older  
464 Australians: a time use survey. *PLoS One.* 2013;8(4): e59379.
- 465 46. Deruaz-Luyet A, N'Goran AA, Tandjung R, Frey P, Zeller A, Haller DM, et al.  
466 Multimorbidity in primary care: protocol of a national cross-sectional study in Switzerland. *BMJ*  
467 *Open.* 2015;5(10):e009165.
- 468 47. Oliver D. David Oliver: A manifesto for multimorbidity. *BMJ.* 2018;360:k1044.
- 469 48. Feather A. Managing patients with multimorbidity. *Medicine.* 2018;46(7):397-401.
- 470 49. Kadam U. Redesigning the general practice consultation to improve care for patients  
471 with multimorbidity. *BMJ.* 2012;345:e6202.

- 472 50. Wise J. Patients with multimorbidity need longer GP consultations, says RCGP. *BMJ*.  
473 2016;355:i5961.
- 474 51. Loeb DF, Bayliss EA, Candrian C, De Gruy FV, Binswanger IA. Treating complex  
475 patients in primary care: Physician offer a new view of competing demands. *Journal of*  
476 *General Internal Medicine*. 2013; 28(1): S224-S225.
- 477 52. Bower P, Macdonald W, Harkness E, Gask L, Kendrick T, Valderas JM, et al.  
478 Multimorbidity, service organization and clinical decision making in primary care: a qualitative  
479 study. *Fam Pract*. 2011;28(5):579-87.
- 480 53. Irving G, Neves AL, Dambha-Miller H, Oishi A, Tagashira H, Verho A, et al.  
481 International variations in primary care physician consultation time: a systematic review of 67  
482 countries. *BMJ Open*. 2017;7(10):e017902.
- 483 54. O'Malley AS, Sarwar R, Keith R, Balke P, Ma S, McCall N. Provider Experiences with  
484 Chronic Care Management (CCM) Services and Fees: A Qualitative Research Study. *J Gen*  
485 *Intern Med*. 2017;32(12):1294-300.
- 486 55. Klement A, Oemler M, Wienke A, Richter M, Wolfradt U. [(Expected) Consultation  
487 length, mental (co-)morbidity and patient satisfaction in the family practice encounter]. *Z Evid*  
488 *Fortbild Qual Gesundheitswes*. 2015;109(8):560-9.
- 489 56. Mühlhäuser U, Götz K, Weinmayr L-M, Steinhäuser J. DEGAM-guidelines  
490 "multimorbidity" – a field test. *Zeitschrift für Allgemeinmedizin*. 2018; 94(2): 64-69.
- 491 57. Gruneir A, Dhalla IA, van Walraven C, Fischer HD, Camacho X, Rochon PA, et al.  
492 Unplanned readmissions after hospital discharge among patients identified as being at high  
493 risk for readmission using a validated predictive algorithm. *Open Medicine*. 2011; 5(2): E104-  
494 E111.

- 495 58. Moth G, Vestergaard M, Vedsted P. Chronic care management in Danish general  
496 practice--a cross-sectional study of workload and multimorbidity. *BMC Fam Pract.* 2012;13:52.
- 497 59. Pringle M, Stewart-Evans C. Does awareness of being video recorded affect doctors'  
498 consultation behaviour?. *British Journal of General Practice.* 1990;40:455–458.
- 499 60. Holden JD. Hawthorne effects and research into professional practice. *Journal of*  
500 *Evaluation in Clinical Practice.* 2001;7:65–70.
- 501 61. [https://ecamfic.wordpress.com/2018/10/21/documento-de-posicionamiento-sobre-el-](https://ecamfic.wordpress.com/2018/10/21/documento-de-posicionamiento-sobre-el-hiperregistro-registritis-en-el-encuentro-clinico-profesional-paciente-en-la-atencion-primaria-ap/)  
502 [hiperregistro-registritis-en-el-encuentro-clinico-profesional-paciente-en-la-atencion-primaria-](https://ecamfic.wordpress.com/2018/10/21/documento-de-posicionamiento-sobre-el-hiperregistro-registritis-en-el-encuentro-clinico-profesional-paciente-en-la-atencion-primaria-ap/)  
503 [ap/](https://ecamfic.wordpress.com/2018/10/21/documento-de-posicionamiento-sobre-el-hiperregistro-registritis-en-el-encuentro-clinico-profesional-paciente-en-la-atencion-primaria-ap/) [assessed the 11<sup>th</sup> September 2019]
- 504 62. Laranjo L, Dunn AG, Tong HL, Kocaballi AB, Chen J, Bashir R, et al. Conversational  
505 agents in healthcare: a systematic review. *Journal of the American Medical Informatics*  
506 *Association,* 25(9), 2018, 1248–1258. doi: 10.1093/jamia/ocy072
- 507
- 508 63. Veja PB, Losi S, Martinez LS, Bovell-Ammon A, Garg A, James T, et al. Implementing an  
509 EHR-based Screening and Referral System to Address Social Determinants of Health in  
510 Primary Care. *Med Care* 2019;57: S133–S139
